# Supplementary material for: ANGSD: Analysis of Next Generation Sequencing Data
Source: PubMed Central journal article supplement (PMC4248462; doi:10.1186/s12859-014-0356-4), 2014-11-25

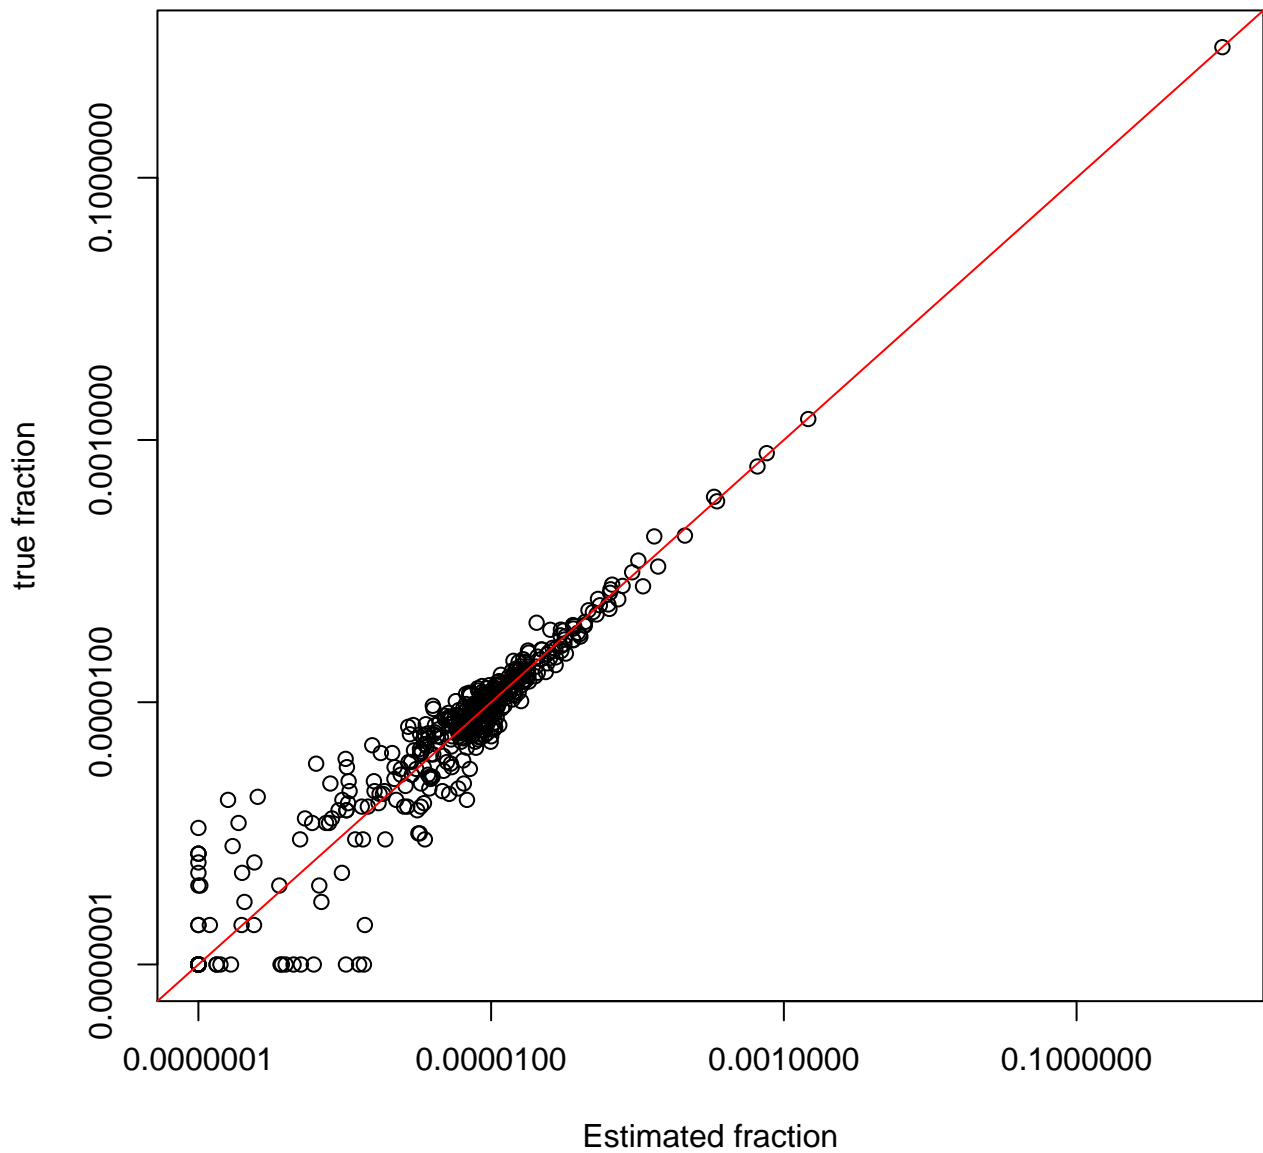

Supplement: 12859_2014_356_MOESM3_ESM.pdf [file 12859_2014_356_MOESM3_ESM.pdf]
